# Supplementary material for: HPV vaccine hesitancy among parents and caregivers of adolescents in Northern Nigeria
Source: PubMed Central journal article supplement — Vaccine X. 2024 Nov 23;21:100591. doi: 10.1016/j.jvacx.2024.100591 (PMC11646742; doi:10.1016/j.jvacx.2024.100591), 2024-11-23
Supplement: mmc1.pdf [file mmc1.pdf]

**Assessment of parents' intent to vaccinate adolescents against Human Papillomavirus in Kano State, Nigeria: A mixed-methods study**

**SURVEY**

| <b>IDENTIFICATION</b> |  |
|-----------------------|--|
| LOCAL GOVT. AREA      |  |
| LOCALITY              |  |
| CLUSTER NUMBER        |  |
| DATE OF INTERVIEW     |  |
| DATA COLLECTOR'S NAME |  |

**INTRODUCTION AND CONSENT**

Good morning/afternoon. My name is \_\_\_\_\_. I am working with research teams at the Bayero University Kano and Adelphi University, USA. We are conducting a survey about Human Papillomavirus in Kano. The information we collect will help us understand parents' beliefs about Human Papillomavirus and assist in planning vaccination programs. Your household was selected for the survey. I would like to ask you some questions, and this usually takes about 20 to 30 minutes. The potential risks associated with this study are minimal. There are no physical, financial, or legal risks; however, it is possible that you may feel uncomfortable when answering study questions. All of the answers you give will be confidential and will not be shared with anyone other than members of our survey team. You do not have to be in the survey, but we hope you will agree to answer the questions since your views are important. If I ask you any question you don't want to answer, just let me know, and I will go on to the next question, or you can stop the interview at any time. In case you need more information about the survey, you may contact the person listed on this card. GIVE CARD WITH CONTACT INFORMATION.

Do you have any questions?

May I begin the interview now?

SIGNATURE OF INTERVIEWER \_\_\_\_\_ DATE \_\_\_\_\_

**SCREENING QUESTIONS**

1. Do you live in this household? Yes      No

**If "No"**

Thank you very much, but we are only gathering information from parents who reside in selected households. **STOP.**

2. Do you have any children between the ages of 9 -14 years living in this household? Yes      No

**If "No"**

Thank you very much, but we are only interviewing parents with children ages 9 -14 at this time. **STOP.**

**If the answers to the questions above are YES, proceed to the survey questions.**

**SECTION 1: SOCIODEMOGRAPHIC CHARACTERISTICS****ABOUT PARENT**

| NO | QUESTIONS AND FILTERS                                     | CODING CATEGORIES                                                                                                                                                                                                                                                                                                                                                                                                                                                                                                                                                                                                    | SKIP |
|----|-----------------------------------------------------------|----------------------------------------------------------------------------------------------------------------------------------------------------------------------------------------------------------------------------------------------------------------------------------------------------------------------------------------------------------------------------------------------------------------------------------------------------------------------------------------------------------------------------------------------------------------------------------------------------------------------|------|
| 1  | Who is the respondent?                                    | Father (1)<br>Mother (2)<br>Caregiver (3)                                                                                                                                                                                                                                                                                                                                                                                                                                                                                                                                                                            |      |
| 2  | Gender                                                    | Male (1)<br>Female (2)                                                                                                                                                                                                                                                                                                                                                                                                                                                                                                                                                                                               |      |
| 3  | How old were you at your last birthday?                   | _____ years                                                                                                                                                                                                                                                                                                                                                                                                                                                                                                                                                                                                          |      |
| 4  | What is your relationship with the head of the household? | Head (1)<br>Wife or husband (2)<br>Son or daughter (3)<br>Son-in-law or daughter-in-law (4)<br>Parent (5)<br>Parent-in-law (6)<br>Brother or sister (7) Grandchild (8)<br>Niece/nephew (9)<br>Other relative (10)<br>Don't know (11)                                                                                                                                                                                                                                                                                                                                                                                 |      |
| 5  | What is your current marital status?                      | Married or living together (1)<br>Divorced/ separated (2)<br>Widowed (3)<br>Never married or never lived together (4)                                                                                                                                                                                                                                                                                                                                                                                                                                                                                                |      |
| 6  | What is the highest level of school you have attended?    | None (1)<br>Non-Formal (2)<br>Primary (3)<br>Secondary (4)<br>Higher (5)                                                                                                                                                                                                                                                                                                                                                                                                                                                                                                                                             |      |
| 7  | What is your occupation?                                  | 1a Senior political/judicial/legislative office holders (federal and state); Top echelon of military and paramilitary; Heads of ministries, department, and agencies (on CONTOPSAL scale)<br><br>1b Top level entrepreneurs and professionals, top management staff of public and private companies, top level politicians, top rank and first-class monarchs, and accomplished internet bloggers, media magnates and proprietors<br><br>2a Top civil and public servants in directorate grade, senior military and paramilitary officers, senior academics, senior politicians, and other political office holders. |      |

|   |                        |                                                                                                                                                                                                                                                                                                                                                                                                                                                                                                                                                                                                                                                                                                                                                                                                                                                                                                                                                                                                                                                                                                                                                                                                                                                 |  |
|---|------------------------|-------------------------------------------------------------------------------------------------------------------------------------------------------------------------------------------------------------------------------------------------------------------------------------------------------------------------------------------------------------------------------------------------------------------------------------------------------------------------------------------------------------------------------------------------------------------------------------------------------------------------------------------------------------------------------------------------------------------------------------------------------------------------------------------------------------------------------------------------------------------------------------------------------------------------------------------------------------------------------------------------------------------------------------------------------------------------------------------------------------------------------------------------------------------------------------------------------------------------------------------------|--|
|   |                        | <p>2b Other professionals and managers, large scale traders and businessmen, established contractors, very senior clergy, second class monarchs, editors and top executives of media houses, and accomplished film producers and artists</p> <p>3a Senior civil and public servants in non-directorate grade, junior academicians, junior military and para- military officers, senior schoolteachers, and junior judicial officers and other politicians</p> <p>3b Technologists, skilled professionals, self-employed artisans, other monarchs, agricultural entrepreneurs, medium scale traders and contractors, senior clergymen, and senior media practitioners and seasoned artists</p> <p>4a Intermediate civil and public servants, executive officers, senior clerical officers, junior school teachers, local government legislators</p> <p>4b Technicians and employee artisans, non-subsistence agriculturalists, petty contractors, other non-employee clergymen, other media practitioners and artists</p> <p>5a Clerical officers, assistants, and attendants</p> <p>5b Petty traders, subsistence farmer, and employee clergymen</p> <p>6a Unemployed</p> <p>6b Full time housewives, students, and artisan apprenticeships</p> |  |
| 8 | What is your religion? | <p>Islam (1)</p> <p>Catholic (2)</p> <p>Other Christian (3)</p>                                                                                                                                                                                                                                                                                                                                                                                                                                                                                                                                                                                                                                                                                                                                                                                                                                                                                                                                                                                                                                                                                                                                                                                 |  |

|    |                                                       |                                                                        |  |
|----|-------------------------------------------------------|------------------------------------------------------------------------|--|
|    |                                                       | Traditionalist (4)<br>Other (5)                                        |  |
| 9  | What is your ethnic group?                            | Hausa (1)<br>Fulani (2)<br>Yoruba (3)<br>Ibo (4)<br>Other (5), specify |  |
| 10 | Place of residence?                                   | Urban (1)<br>Rural (2)                                                 |  |
| 11 | How many children do you have in total?               | _____                                                                  |  |
| 12 | How many male children do you have?                   |                                                                        |  |
| 13 | How many female children do you have?                 |                                                                        |  |
| 14 | What is your total monthly household income in Naira? | _____                                                                  |  |
| 15 | What is the total number of people in your household? | _____                                                                  |  |

**ABOUT ADOLESCENT: The following questions are about the selected adolescent child**

| NO | QUESTIONS AND FILTERS                                                                           | CODING CATEGORIES                                          | SKIP               |
|----|-------------------------------------------------------------------------------------------------|------------------------------------------------------------|--------------------|
| 16 | Do you have more than one child aged 9-14 years living in this household?                       | Yes (1)<br>No (2)                                          | If No, skip to Q15 |
| 17 | List their first names. The interviewer will <b>randomly</b> select one to ask questions about. |                                                            |                    |
| 18 | How old was (child) on (her/his) last birthday?                                                 | _____ years                                                |                    |
| 19 | What is (child)'s gender?                                                                       | Male (1)<br>Female (2)                                     |                    |
| 20 | Is (child) married?                                                                             | Yes (1)<br>No (2)                                          |                    |
| 21 | What is the highest level of school (child) has attended?                                       | None (1)<br>Non-Formal (2)<br>Primary (3)<br>Secondary (4) |                    |
| 22 | Does (child) have any disability?                                                               | Yes (1), if yes specify<br>No (2)                          |                    |

**SECTION 2: HPV HEALTH LITERACY (HL)** will be measured by assessing knowledge about HPV, HPV-related infection and cancer, HPV vaccine, and prevention of HPV infection.

| NO | QUESTIONS AND FILTERS                                                                                         | CODING CATEGORIES                                                                                                            | SKIP               |
|----|---------------------------------------------------------------------------------------------------------------|------------------------------------------------------------------------------------------------------------------------------|--------------------|
| 23 | Have you ever heard of HPV? HPV stands for Human Papillomavirus. <b><u>It is not HIV, HSV, or herpes.</u></b> | Yes (1)<br>No (2)                                                                                                            | If No, skip to Q22 |
| 24 | Where have you heard about HPV?<br>Mark all that apply                                                        | Doctor, nurse, or other health care professional (1)<br>Family or friends (2)<br>Newspaper or magazine (3)<br>Television (4) |                    |

|    |                                                                                                                                                                                                                                                                |                                                                  |  |
|----|----------------------------------------------------------------------------------------------------------------------------------------------------------------------------------------------------------------------------------------------------------------|------------------------------------------------------------------|--|
|    |                                                                                                                                                                                                                                                                | Internet (5)<br>Radio (6)<br>Don't remember (7)<br>Other (8)     |  |
| 25 | Do you think HPV can cause cervical cancer?                                                                                                                                                                                                                    | Yes (1)<br>No (2)                                                |  |
| 26 | Do you think HPV can cause penile cancer?                                                                                                                                                                                                                      | Yes (1)<br>No (2)                                                |  |
| 27 | Do you think HPV can cause anal cancer?                                                                                                                                                                                                                        | Yes (1)<br>No (2)                                                |  |
| 28 | Do you think HPV can cause oral cancer?                                                                                                                                                                                                                        | Yes (1)<br>No (2)                                                |  |
| 29 | Do you think HPV can cause genital warts?                                                                                                                                                                                                                      |                                                                  |  |
| 30 | Do you think one can get HPV through the following ways? (note: repeat question for each response)<br>a) Sexual intercourse<br>b) Close skin-to-skin touching during sex<br>c) Sharing needles, or syringes<br>d) Pregnancy<br>e) Delivery<br>f) Breastfeeding | Yes (1)<br>No (2)<br>Don't know (3)                              |  |
| 31 | Do you think HPV can go away on its own, without any treatment?                                                                                                                                                                                                | Yes (1)<br>No (2)                                                |  |
| 32 | Who is at risk of HPV infection?                                                                                                                                                                                                                               | Males only (1)<br>Females only (2)<br>Both females and males (3) |  |
| 33 | Which of the following increases the risks of having HPV infection? (note: repeat question for each response)<br>a) Multiples sexual partners<br>b) Early age at first intercourse<br>c) Unprotected sex                                                       | Yes (1)<br>No (2)<br>Don't know (3)                              |  |
| 34 | In what way (s) can a person be protected against HPV? (note: repeat question for each response)<br>a) Vaccine<br>b) Condom use<br>c) Pills                                                                                                                    | Yes (1)<br>No (2)<br>Don't know (3)                              |  |
| 35 | Have you ever been told by a health care provider that you had a human papillomavirus or HPV infection?                                                                                                                                                        | Yes (1)<br>No (2)                                                |  |
| 36 | Have you ever been screened for cervical cancer? (Ask Female)<br>Has your partner ever been screened for cervical cancer? (Ask Male)                                                                                                                           | Yes (1)<br>No (2)<br>Don't know (3)                              |  |
| 37 | A vaccine to prevent HPV infection is available and is called the cervical cancer vaccine or HPV vaccine. Before today, have you ever heard of the Cervical cancer vaccine or HPV vaccine?                                                                     | Yes (1)<br>No (2)                                                |  |

|    |                                                                                                                       |                   |  |
|----|-----------------------------------------------------------------------------------------------------------------------|-------------------|--|
| 38 | Has a health care provider such as a doctor or nurse ever talked to you about getting the HPV vaccine for your child? | Yes (1)<br>No (2) |  |
|----|-----------------------------------------------------------------------------------------------------------------------|-------------------|--|

**SECTION 3: HPV VACCINE UPTAKE AND CONFIDENCE**

| NO | QUESTIONS AND FILTERS                                                              | CODING CATEGORIES                                                                                                                                                                                                                                                                                                                                                                         | SKIP                         |
|----|------------------------------------------------------------------------------------|-------------------------------------------------------------------------------------------------------------------------------------------------------------------------------------------------------------------------------------------------------------------------------------------------------------------------------------------------------------------------------------------|------------------------------|
| 39 | Do you have the intention to have (child) receive the HPV vaccine?                 | I was unaware that the HPV vaccine could be given to [child] (1)<br>I have never thought about vaccinating [child] against HPV (2)<br>I am undecided about vaccinating [child] against HPV (3)<br>I have decided I do not want to vaccinate [child] against HPV (4)<br>I have decided I do want to vaccinate [child] against HPV" (5)<br>[Child] has already received the HPV vaccine (6) | If options 1-5, skip to Q41. |
| 40 | How old was (child) when they received their first HPV shot?                       | __ years                                                                                                                                                                                                                                                                                                                                                                                  |                              |
| 41 | How many doses has (child) received?                                               | 1 Dose (1)<br>2 Doses (2)<br>3 Doses (3)<br>Refused (7)<br>Don't Know (9)                                                                                                                                                                                                                                                                                                                 |                              |
| 42 | Do you have a card or other document where (child)'s vaccinations are written down | Yes, has only a card (1)<br>Yes, has only another document (2)<br>Yes, has a card and another document (3)                                                                                                                                                                                                                                                                                | Skip for option 4. Go to Q43 |



|     |                                                                                                                                                                                                                                                                                                                                                                                                                                                                                                                                                                                                                                       |                                                                                                                                                    |                              |     |     |  |  |  |  |
|-----|---------------------------------------------------------------------------------------------------------------------------------------------------------------------------------------------------------------------------------------------------------------------------------------------------------------------------------------------------------------------------------------------------------------------------------------------------------------------------------------------------------------------------------------------------------------------------------------------------------------------------------------|----------------------------------------------------------------------------------------------------------------------------------------------------|------------------------------|-----|-----|--|--|--|--|
|     |                                                                                                                                                                                                                                                                                                                                                                                                                                                                                                                                                                                                                                       | No, no card, and no other document (4)                                                                                                             |                              |     |     |  |  |  |  |
| 43  | May I see the card or other document where (child)'s vaccinations are written down?                                                                                                                                                                                                                                                                                                                                                                                                                                                                                                                                                   | Yes, only card seen (1)<br>Yes, only other document is seen (2)<br>Yes, card and other document seen (3)<br>No card and no other document seen (4) | Skip for option 4. Go to Q43 |     |     |  |  |  |  |
| 44  | Copy dates from the card.<br>HPV dose 1                                                                                                                                                                                                                                                                                                                                                                                                                                                                                                                                                                                               | <table border="1"> <tr> <td>Mon</td> <td>Day</td> <td>Yr.</td> </tr> <tr> <td></td> <td></td> <td></td> </tr> </table>                             | Mon                          | Day | Yr. |  |  |  |  |
| Mon | Day                                                                                                                                                                                                                                                                                                                                                                                                                                                                                                                                                                                                                                   | Yr.                                                                                                                                                |                              |     |     |  |  |  |  |
|     |                                                                                                                                                                                                                                                                                                                                                                                                                                                                                                                                                                                                                                       |                                                                                                                                                    |                              |     |     |  |  |  |  |
| 45  | Copy dates from the card.<br>HPV dose 2                                                                                                                                                                                                                                                                                                                                                                                                                                                                                                                                                                                               | <table border="1"> <tr> <td>Mon</td> <td>Day</td> <td>Yr.</td> </tr> <tr> <td></td> <td></td> <td></td> </tr> </table>                             | Mon                          | Day | Yr. |  |  |  |  |
| Mon | Day                                                                                                                                                                                                                                                                                                                                                                                                                                                                                                                                                                                                                                   | Yr.                                                                                                                                                |                              |     |     |  |  |  |  |
|     |                                                                                                                                                                                                                                                                                                                                                                                                                                                                                                                                                                                                                                       |                                                                                                                                                    |                              |     |     |  |  |  |  |
| 46  | Copy dates from the card.<br>HPV dose                                                                                                                                                                                                                                                                                                                                                                                                                                                                                                                                                                                                 | <table border="1"> <tr> <td>Mon</td> <td>Day</td> <td>Yr.</td> </tr> <tr> <td></td> <td></td> <td></td> </tr> </table>                             | Mon                          | Day | Yr. |  |  |  |  |
| Mon | Day                                                                                                                                                                                                                                                                                                                                                                                                                                                                                                                                                                                                                                   | Yr.                                                                                                                                                |                              |     |     |  |  |  |  |
|     |                                                                                                                                                                                                                                                                                                                                                                                                                                                                                                                                                                                                                                       |                                                                                                                                                    |                              |     |     |  |  |  |  |
| 47  | Respond to the following questions using a scale of 0 ("strongly disagree") to 10 ("strongly agree") <ul style="list-style-type: none"> <li>a. Vaccines are necessary to protect the health of teenagers</li> <li>b. Vaccines do a good job in preventing the diseases they are intended to prevent.</li> <li>c. Vaccines are safe.</li> <li>d. If I do not vaccinate my teenager, he/she may get a disease such as meningitis and cause other teenagers or adults also to get the disease.</li> <li>e. Teenagers receive too many vaccines.</li> <li>f. If I vaccinate my teenager, he/she may have serious side effects.</li> </ul> | 0 ("strongly disagree") to 10 ("strongly agree")                                                                                                   |                              |     |     |  |  |  |  |

|    |                                                                                                                                                                                                                                                                                                                                                                                                                                                                                                                                         |                                                                       |                                            |
|----|-----------------------------------------------------------------------------------------------------------------------------------------------------------------------------------------------------------------------------------------------------------------------------------------------------------------------------------------------------------------------------------------------------------------------------------------------------------------------------------------------------------------------------------------|-----------------------------------------------------------------------|--------------------------------------------|
|    | <p>g. In general, medical professionals in charge of vaccinations have my teenager's best interest at heart.</p> <p>h. I have a good relationship with my teenager's healthcare provider.</p>                                                                                                                                                                                                                                                                                                                                           |                                                                       |                                            |
| 48 | Would you support the HPV vaccine for adolescent girls?                                                                                                                                                                                                                                                                                                                                                                                                                                                                                 | <p>Yes (1)</p> <p>No (2)</p> <p>Refused (3)</p> <p>Don't know (4)</p> |                                            |
| 49 | Would you support the HPV vaccine for adolescent boys?                                                                                                                                                                                                                                                                                                                                                                                                                                                                                  | <p>Yes (1)</p> <p>No (2)</p> <p>Refused (3)</p> <p>Don't know (4)</p> |                                            |
| 50 | <p>What are the MAIN reasons you would NOT want to get the vaccine for (child)?</p> <p>a) Does not need vaccine</p> <p>b) Not sexually active</p> <p>c) Too expensive</p> <p>d) Too young for vaccine</p> <p>e) Doctor didn't recommend it</p> <p>f) Worried about safety of the vaccine</p> <p>g) Don't know where to get vaccine</p> <p>h) My spouse/family member is against it</p> <p>i) My religion is against it</p> <p>j) Don't know enough about the vaccine</p> <p>k) Already have HPV infection</p> <p>l) Other (specify)</p> | <p>Yes (1)</p> <p>No (2)</p>                                          | Skip for options 5 and 6 to Q34. Go to Q49 |
| 51 | If you could get the HPV vaccine free or at a much lower cost, would you get it?                                                                                                                                                                                                                                                                                                                                                                                                                                                        | <p>Yes (1)</p> <p>No (2)</p> <p>Refused (3)</p> <p>Don't know (4)</p> | If options 2, 3, or 4<br>Skip to Q49       |
| 52 | How much are you willing to pay for the complete series of the HPV vaccine?                                                                                                                                                                                                                                                                                                                                                                                                                                                             | -----                                                                 |                                            |

|    |                                                                                                                                                     |                                     |  |
|----|-----------------------------------------------------------------------------------------------------------------------------------------------------|-------------------------------------|--|
| 53 | Did (child) ever receive any vaccinations to prevent them from getting diseases, including vaccinations received in campaigns or immunization days? | Yes (1)<br>No (2)<br>Don't know (3) |  |
|----|-----------------------------------------------------------------------------------------------------------------------------------------------------|-------------------------------------|--|

**Section 4: Looking for Health Information**

|    |                                                                                                                                                                                                                                                                                                      |                                                                                                                                |                                 |
|----|------------------------------------------------------------------------------------------------------------------------------------------------------------------------------------------------------------------------------------------------------------------------------------------------------|--------------------------------------------------------------------------------------------------------------------------------|---------------------------------|
| 54 | Have you ever looked for information about vaccines from any source?                                                                                                                                                                                                                                 | Yes (1)<br>No (2)<br>Don't know (3)                                                                                            | If options 2 or 3, skip to Q52. |
| 55 | Based on the results of your most recent search for information about vaccines, how much do you agree or disagree with each of the following statements?<br>a. It took a lot of effort to get the information you needed<br>b. You felt frustrated during your search for the information            | Strongly agree (1)<br>Somewhat agree (2)<br>Somewhat disagree (3)<br>Strongly disagree (4)                                     |                                 |
| 56 | Overall, how confident are you that you could get advice or information about vaccines if you needed it?                                                                                                                                                                                             | Completely confident (1)<br>Very confident (2)<br>Somewhat confident (3)<br>A little confident (4)<br>Not confident at all (5) |                                 |
| 57 | In general, how much would you trust information about vaccines from each of the following?<br>a. A doctor<br>b. A nurse or health care worker<br>c. Family or friends<br>d. Government health agencies<br>e. Charitable organizations<br>f. Religious organizations and leaders.<br>g. Social Media | Not at all (1)<br>A little (2)<br>Some (3)<br>A lot (4)                                                                        |                                 |

|    |                                                                                                 |                                                                                                                                                                                                                                                                                                                                                                                                                                                                   |  |
|----|-------------------------------------------------------------------------------------------------|-------------------------------------------------------------------------------------------------------------------------------------------------------------------------------------------------------------------------------------------------------------------------------------------------------------------------------------------------------------------------------------------------------------------------------------------------------------------|--|
| 58 | Imagine that you had a strong need to get information about vaccines. Where would you go first? | <p><b>Mark only one.</b></p> <p>Books (1)</p> <p>Brochures, pamphlets, etc. (2)</p> <p>Cancer organization (3)</p> <p>Family (4)</p> <p>Friend/Co-worker (5)</p> <p>Doctor or health care provider (6)</p> <p>Internet (7)</p> <p>Social Media (8)</p> <p>Library (9)</p> <p>Magazines (10)</p> <p>Newspapers (11)</p> <p>Telephone information number (12)</p> <p>Traditional healers (13)</p> <p>Religious leader (14)</p> <p>Other (15)-<br/>Specify _____</p> |  |
| 59 | Please indicate if you have each of the following.                                              | <p>Mark all that apply.</p> <p>Tablet computer (for example, an iPad, Samsung Galaxy, Motorola Xoom, or Kindle Fire) (1)</p> <p>Smartphone (for example, an iPhone, Android, Blackberry, or Windows phone) (2)</p> <p>Basic cell phone only (3)</p> <p>I do not have any of the above (4)</p>                                                                                                                                                                     |  |
| 60 | Do you read a newspaper or magazine, at least once a week, less than once a week or not at all? | <p>At least once a week (1)</p> <p>Less than once a week (2)</p> <p>Not at all (3)</p> <p>Cannot read (4)</p>                                                                                                                                                                                                                                                                                                                                                     |  |

|    |                                                                                         |                                                                                          |  |
|----|-----------------------------------------------------------------------------------------|------------------------------------------------------------------------------------------|--|
| 61 | Do you listen to the radio, at least once a week, less than once a week, or not at all? | At least once a week (1)<br>Less than once a week 2<br>Not at all (3)<br>Cannot read (4) |  |
| 62 | Do you watch television, at least once a week, less than once a week or not at all?     | At least once a week (1)<br>Less than once a week 2<br>Not at all (3)<br>Cannot read (4) |  |

**Thank you very much for your time.**
